# Supplementary material
Source: PubMed Central journal article supplement (PMC3135926)
Supplement: supp_pp.111.175471_175471fig.pdf [file supp_pp.111.175471_175471fig.pdf]

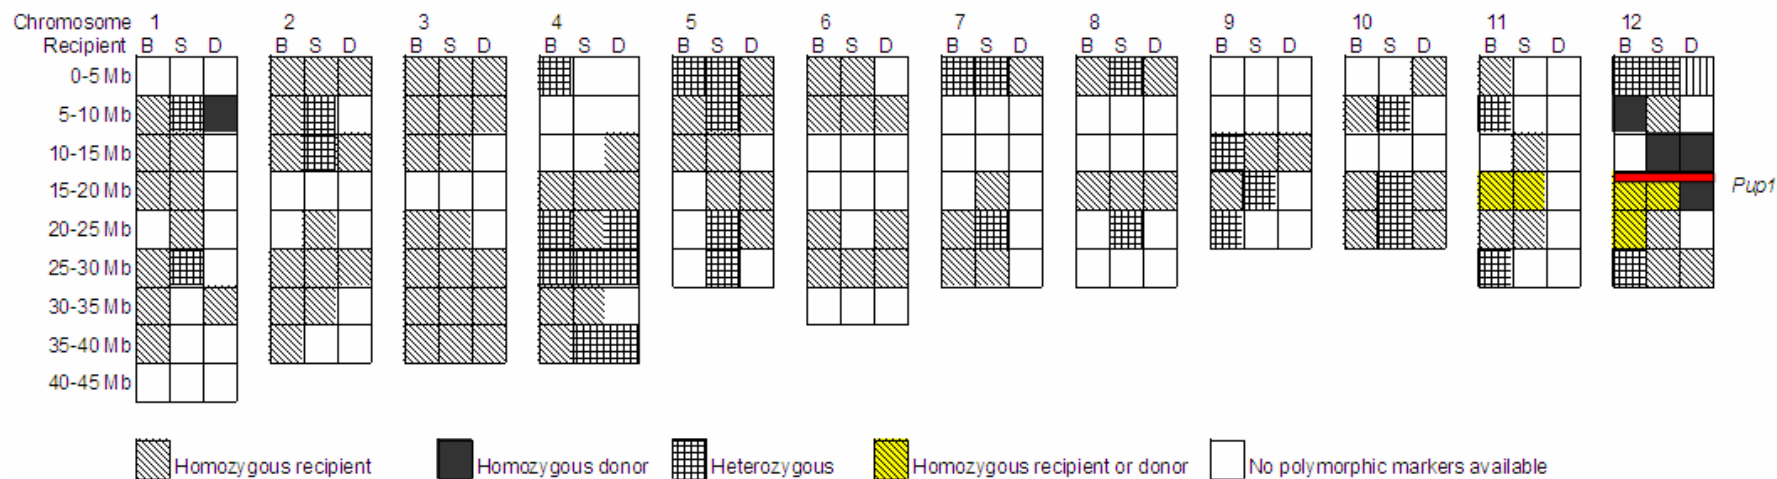

### Supplemental Figure 1. Graphical genotype of Indonesian *Pup1* introgression lines

*Pup1* breeding lines of three Indonesian rice varieties (B=Batur, S=Situ Bagendit, D=Dodokan) were genotyped with a set of polymorphic SSR markers (47 to 61 SSRs depending on the population). The schematic overview of the data represents the genotype of several plants analyzed from the different breeding populations. The presence of the tolerant *Pup1* locus was determined using *Pup1* foreground markers.
